# Supplementary material for: The association between 24-hour movement behaviours and cognitive function in adults aged 55 and above: a cross-sectional compositional data analysis of the PASOCA study
Source: Research Square preprint supplement (doi:10.21203/rs.3.rs-6405264/v1), 2025-05-13
Supplement: Supplementary file 1 [file d909d76fce6c5808c8c2df56.docx]

**Supplementary files belonging to ‘The association between 24-hour movement behaviours and cognitive function in adults aged 55 and above: a cross-sectional compositional data analysis of the PASOCA study’ by Marent et al. (2025)**

Contents

[Supplementary Table 1A. Description of the cognitive tests and outcomes used. 2](#_Toc195023230)

[Supplementary Table 1B. Description of the cognitive composite scores with the specific task outcomes. 4](#_Toc195023231)

[Supplementary Table 2. Model 2 estimates for each cognitive outcome. 5](#_Toc195023232)

[Supplementary Table 3. Hypothetical time reallocations and their associated mean differences in short-term memory z-scores. 7](#_Toc195023233)

[Supplementary Table 4A. Hypothetical time reallocations and their associated positive mean differences in executive function z-scores. 8](#_Toc195023234)

[Supplementary Table 4B. Hypothetical time reallocations and their associated negative mean differences in executive function z-scores. 9](#_Toc195023235)

[Supplementary Table 5. Hypothetical time reallocations and their associated mean differences in short-term memory z-scores. 10](#_Toc195023236)

[Supplementary Table 6. Hypothetical time reallocations and their associated mean differences in executive function z-scores. 11](#_Toc195023237)

[Supplementary figure 1. Hypothetical time reallocations and their predicted mean differences in cognitive z-scores. 12](#_Toc195023238)

Supplementary Table 1A. Description of the cognitive tests and outcomes used.

| **NAME AND ORDER OF TASKS** | **DESCRIPTION a** | **OUTCOMES a** |
| --- | --- | --- |
| 1. **Motor Screening Task**   *MOT Voice* | Coloured crosses are presented in different locations on the screen, one at a time. The participant must select the cross on the screen as quickly and accurately as possible. | Familiarisation task |
| 1. **Delayed Matching to Sample**   *DMS Recommended Standard* | The participant is shown a complex visual pattern, that is both abstract and non-verbal (the sample), followed by four similar patterns, after a brief delay. The participant must select the pattern which exactly matches the sample. In some trials the sample and the choice patterns are shown simultaneously, in others there is a delay (of 0, 4 or 12 seconds) before the four choices appear. | **DMSPCAD -** Percent Correct (all delays): The percentage of assessment trials containing a delay during which the subject chose the correct box on their first box choice. Calculated across all assessed trials containing a delay.  **DMSMDLS** - Median Correct Latency (simultaneous): The median latency between the presentation of the response stimuli options and the subject selecting the correct box on their first attempt. Calculated across all assessed trials containing simultaneous presentation. |
| 1. **Verbal Recognition Memory**   *VRM Recommended Standard (immediate)* | The participant is shown a sequence of 18 words on screen one by one. The participant is then tasked with recalling the words, whilst a rater marks which ones they remembered. In the next phase, the participant is presented with a sequence of 36 words on screen one by one, 18 from the original list and 18 distractors and is asked to choose as fast as possible whether they have seen it before, yes/no. The latter recognition phase is then repeated after a delay of minimum 20 minutes (see 6). | **VRMFRDS -** Free Recall Distinct Stimuli: The total number of distinct words that are correctly recalled from the presentation phase by the subject during the immediate free recall stage.  **VRMIRTC** - Immediate Recognition Total Correct: The total number of target words that the subject correctly recognises, plus the total number of distractor words that the subject correctly rejects. |
| 1. **One Touch Stockings of Cambridge**   *OTS Standard* | The participant is shown two displays containing three coloured balls. The displays are presented in such a way that they can be easily perceived as stacks of coloured balls held in stockings or socks suspended from a beam. This arrangement makes the 3-D concepts involved apparent to the participant and fits with the verbal instructions. There is a row of numbered boxes along the bottom of the screen.  The participant needs to move the balls in the lower display to copy the pattern in the upper display. They must work out in their head how many moves the solutions require and then select the appropriate box at the bottom of the screen to indicate their response. | **OTSMDLC** - Median Latency to Correct: The median latency, measured from the appearance of the stocking balls until the correct box choice was made by the subject. Calculated across all assessed trials.  **OTSPSFC** - Problems Solved on First Choice: The total number of assessed trials where the subject chose the correct answer on their first attempt. Calculated across all assessed trials. |
| 1. **Spatial Working Memory**   *SWM Recommended Standard 2.0 Extended* | The test begins with a number of coloured squares (boxes) shown on the screen. The aim of this test is that by selecting the boxes and using a process of elimination, the participant should find one yellow ‘token’ in each of a number of boxes and use them to fill up an empty column on the right-hand side of the screen. The number of boxes are gradually increased until a maximum of 12 boxes are shown for the participants to search. The colour and position of the boxes used are changed from trial to trial to discourage the use of stereotyped search strategies. | **SWMSX** - Strategy (6-12 boxes): The number of times a subject begins a new search pattern from the same box they started with previously. If they always begin a search from the same starting point we infer that the subject is employing a planned strategy for finding the tokens. Therefore a low score indicates high strategy use (1 = they always begin the search from the same box), a high score indicates that they are beginning their searches from many different boxes. Calculated across assessed trials with 6 tokens or more.  **SWMBE46812 -** Between Errors: The number of times the subject incorrectly revisits a box in which a token has previously been found. Calculated across all assessed four, six, eight, 12 token trials. |
| 1. **Verbal Recognition Memory (delayed)** | The participant is presented on the screen with 36 words one-by-one, half of them are from the original list and the other half are new distractors, and is asked to choose as fast as possible if they have seen it before, with a yes/no option. | **VRMDRTC** - Delayed Recognition Total Correct: The total number of target words that the subject correctly recognises in the delayed recognition phase, plus the total number of distractor words that the subject correctly rejects.  **Time interval**: the time (in seconds) between the display of the 18 words (see 3 Verbal Recognition Memory immediate) and the delayed recall phase. Minimum 1200 seconds (20 minutes). |
| ***Break of 5 minutes*** | | |
| 1. **Paired Associates Learning**   *PAL Recommended Standard Extended* | Boxes are displayed on the screen and are “opened” and “closed” in a randomised order. One or more of them will contain a pattern. The patterns are then displayed in the middle of the screen, one at a time and the participant must select the box in which the pattern was originally located. If the participant makes an error, the boxes are opened in sequence again to remind the participant of the locations of the patterns. After four attempts, the tasks ends at the level they reached. Starting with two patterns, with the maximum of 12 patterns. | **PALFAMS28 -** First Attempt Memory Score: The number of times a subject chose the correct box on their first attempt when recalling the pattern locations. Calculated across assessed trials, omitting 12 box level to provide a direct comparison to Recommended Standard.  **PALTEA212** - Total Errors (Adjusted): The number of times the subject chose the incorrect box for a stimulus on assessment problems (PALTE), plus an adjustment for the estimated number of errors they would have made on any problems, attempts and recalls they did not reach. This measure allows you to compare performance on errors made across all subjects regardless of those who terminated early versus those completing the final stage of the task. |
| 1. **Multitasking Test**   *MTT Standard* | The test displays an arrow which can appear on either side of the screen (right or left) and can point in either direction (to the right or to the left). Each trial displays a cue at the top of the screen that indicates to the participant whether they have to select the right or left button according to the “side on which the arrow appeared” or the “direction in which the arrow was pointing”.  In some sections of the task this rule is consistent across trials (single task) while in others it may change from trial to trial in a randomised order (multitasking). Using both rules in a flexible manner places a higher demand on cognition then using a single rule.  Some trials display congruent stimuli (e.g. arrow on the right side pointing to the right) whereas other trials display incongruent stimuli, which require a higher cognitive demand (e.g. arrow on the right side of the screen pointing to the left). | **MTTMTCMD** - Multitasking cost (median): The difference between the median latency of response (from stimulus appearance to button press) during assessed blocks in which both rules are used versus assessed blocks in which only a single rule is used. Calculated by subtracting the median latency of response during single task block(s) from the median latency of response during multitasking block(s). A positive score indicates that the subject responds more slowly during multitasking blocks, and indicates a higher cost of managing multiple sources of information.  **MTTICMD -** Incongruency cost (median): The difference between the median latency of response (from stimulus appearance to button press) on the trials that were congruent versus the trials that were incongruent. Calculated by subtracting the median congruent latency (in ms) from the median incongruent latency. A positive score indicates that the subject is faster on congruent trials and a negative score indicates that the subject is faster on incongruent trials. A higher incongruency cost indicates that the subjects takes longer to process conflicting information.  **MTTTC** - Total correct: The number of trials for which the outcome was a correct response (subject pressed the correct button within the response window). Calculated across all assessed trials. |

a Descriptions are derived from the official explanation of the tasks and outcomes from Cambridge Cognition.

Supplementary Table 1B. Description of the cognitive composite scores with the specific task outcomes.

| **Short-term memory (STM)** | **Long-term memory (LTM)** | **Executive functioning (EF)** | **Processing speed (PS)** |
| --- | --- | --- | --- |
| VRMFRDS | VRMDRTC | MTTMTCMD* | DMSMDLS* |
| VRMIRTC |  | MTTICMD* |  |
| PALFAMS28 |  | MTTTC |  |
| PALTEA212* |  | OTSMDLC* |  |
| DMSPCAD |  | OTSPSFC |  |
|  |  | SWMSX* |  |
|  |  | SWMBE46812* |  |

*See Supplementary Table 1A for the full description of each outcome.*

*STEP 1*: Create z-scores based on the mean of the sample

*STEP 2*: Reverse-score the z-scores for the outcome measures with an Asterix (*) so that a higher score means better performance

*STEP 3*: Calculate the composite scores using the following formulas

STM = (VRMDRDS + VRMIRTC + PALFAMS28 + PALTEA212 + DMSPCAD)/5

LTM = VRMDRTC

EF = (MTTMTCMD + MTTICMD + MTTTC + OTSMDLC + OTSPSFC + SWMSX + SWMBE46812)/7

PS = DMSMDLS

Notes: Mellow, et al. 37 did not include DMSPCAD for STM and SWMSX, SWMBE46812 for EF. In addition we included PALTEA212 (all levels, 2 to 12) for STM while they included PALTEA28 (levels 2 till 8, unsure if there was a level 12 available), and for EF we opted for MTTTC (total correct) versus MTTTIC (total incorrect) and OTSMDLC (response time to correct choice) versus OTSMDLFC (response time to first choice).

Supplementary Table 2. Model 2 estimates for each cognitive outcome.

| **Short-term memory** | | | | | |
| --- | --- | --- | --- | --- | --- |
| **Variable** | **Level** | **Estimate** | **Std. Error** | **t value** | **p-value** |
| (Intercept) |  | 1.12 | 0.49 | 2.28 | **<0.02*** |
| Time use | *ilr* 1 (sleep:remaining) | -0.35 | 0.29 | -1.18 | **<**0.24***** |
|  | *ilr* 2 (SB:[LPA+MVPA]) | 0.17 | 0.19 | 0.87 | **<**0.38***** |
|  | *ilr* 3 (LPA:MVPA) | -0.42 | 0.17 | -2.47 | **<0.01*** |
| Age |  | -0.02 | 0.01 | -2.99 | **<0.01*** |
| Sex | Female | 0.20 | 0.09 | 2.31 | **<0.02*** |
| Education | Middle | 0.09 | 0.14 | 0.66 | **<**0.51***** |
|  | High | 0.47 | 0.13 | 3.68 | **<0.001*** |
| Living arrangement | Together | -0.05 | 0.10 | -0.49 | **<**0.62***** |

| **Long-term memory** | | | | | |
| --- | --- | --- | --- | --- | --- |
| **Variable** | **Level** | **Estimate** | **Std. Error** | **t value** | **p-value** |
| (Intercept) |  | 0.39 | 0.13 | 2.98 | **<0.01*** |
| Time use | *ilr* 1 (sleep:remaining) | 0.10 | 0.08 | 1.33 | 0.19 |
|  | *ilr* 2 (SB:[LPA+MVPA]) | -0.01 | 0.05 | -0.20 | 0.84 |
|  | *ilr* 3 (LPA:MVPA) | 0.04 | 0.04 | 1.00 | 0.32 |
| Age |  | -0.002 | 0.01 | -1.42 | 0.16 |
| Sex | Female | -0.03 | 0.14 | -1.46 | 0.14 |
| Education | Middle | 0.001 | 0.22 | 0.03 | 0.98 |
|  | High | -0.06 | 0.20 | -1.90 | 0.06 |
| Living arrangement | Together | 0.01 | 0.16 | 0.23 | 0.82 |
| Duration |  | 0.0001 | 0.0002 | 3.32 | **<0.01*** |
| **Executive function** | | | | | |
| **Variable** | **Level** | **Estimate** | **Std. Error** | **t value** | **p-value** |
| (Intercept) |  | 1.51 | 0.42 | 3.62 | **<0.001*** |
| Time use | *ilr* 1 (sleep:remaining) | -0.43 | 0.25 | -1.73 | 0.08 |
|  | *ilr* 2 (SB:[LPA+MVPA]) | 0.56 | 0.16 | 3.45 | **<0.001*** |
|  | *ilr* 3 (LPA:MVPA) | -0.53 | 0.15 | -3.64 | **<0.001*** |
| Age |  | -0.03 | 0.01 | -5.71 | **<0.001*** |
| Sex | Female | -0.10 | 0.07 | -1.39 | 0.16 |
| Education | Middle | 0.22 | 0.12 | 1.85 | 0.07 |
|  | High | 0.40 | 0.11 | 3.70 | **<0.001*** |
| Living arrangement | Together | -0.01 | 0.09 | -0.13 | 0.90 |
| **Processing speed** | | | | | |
| **Variable** | **Level** | **Estimate** | **Std. Error** | **t value** | **p-value** |
| (Intercept) |  | 0.26 | 0.13 | 2.05 | **0.04*** |
| Time use | *ilr* 1 (sleep:remaining) | -0.003 | 0.08 | -0.04 | 0.97 |
|  | *ilr* 2 (SB:[LPA+MVPA]) | 0.01 | 0.05 | 0.27 | 0.79 |
|  | *ilr* 3 (LPA:MVPA) | 0.06 | 0.05 | 1.26 | 0.21 |
| Age |  | 0.002 | 0.002 | 1.09 | 0.28 |
| Sex | Female | -0.02 | 0.02 | -1.00 | 0.32 |
| Education | Middle | 0.04 | 0.04 | 1.18 | 0.24 |
|  | High | 0.01 | 0.03 | 0.37 | 0.71 |
| Living arrangement | Together | -0.04 | 0.03 | -1.32 | 0.19 |

Notes: ilr = isometric-log ratio, SB = sedentary behaviour, LPA = light physical activity, MVPA = moderate-to-vigorous physical activity, std. error = standard error

Supplementary Table 3. Hypothetical time reallocations and their associated mean differences in short-term memory z-scores.

| **Time (min)** | **Away from** | **Reallocated to** | **Mean differences in z-score, 95%CI** |
| --- | --- | --- | --- |
| 5 | LPA | MVPA | 0.03 [0.01, 0.06] |
| 10 |  |  | 0.07 [0.02, 0.11] |
| 15 |  |  | 0.10 [0.03, 0.17] |
| 20 |  |  | 0.13 [0.04, 0.22] |
| 25 |  |  | 0.16 [0.05, 0.27] |
| 30 |  |  | 0.19 [0.05, 0.32] |
| 5 | SB | MVPA | 0.02 [0.01, 0.04] |
| 10 |  |  | 0.04 [0.02, 0.07] |
| 15 |  |  | 0.06 [0.03, 0.10] |
| 20 |  |  | 0.08 [0.03, 0.13] |
| 25 |  |  | 0.10 [0.04, 0.16] |
| 30 |  |  | 0.12 [0.05, 0.19] |
| 5 | Sleep | MVPA | 0.03 [0.01, 0.04] |
| 10 |  |  | 0.05 [0.02, 0.09] |
| 15 |  |  | 0.08 [0.03, 0.13] |
| 20 |  |  | 0.10 [0.04, 0.16] |
| 25 |  |  | 0.13 [0.05, 0.20] |
| 30 |  |  | 0.15 [0.06, 0.23] |
| 5 | MVPA | LPA | -0.04 [-0.06, -0.01] |
| 10 |  |  | -0.07 [-0.12, -0.02] |
| 15 |  |  | -0.11 [-0.19, -0.04] |
| 20 |  |  | -0.16 [-0.26, -0.05] |
| 25 |  |  | -0.20 [-0.34, -0.07] |
| 30 |  |  | -0.26 [-0.42, -0.09] |
| 5 | MVPA | SB | -0.03 [-0.04, -0.01] |
| 10 |  |  | -0.05 [-0.08, -0.02] |
| 15 |  |  | -0.08 [-0.13, -0.03] |
| 20 |  |  | -0.12 [-0.19, -0.05] |
| 25 |  |  | -0.16 [-0.25, -0.07] |
| 30 |  |  | -0.20 [-0.31, -0.08] |
| 5 | MVPA | Sleep | -0.03 [-0.05, -0.01] |
| 10 |  |  | -0.06 [-0.10, -0.03] |
| 15 |  |  | -0.10 [-0.15, -0.04] |
| 20 |  |  | -0.14 [-0.21, -0.06] |
| 25 |  |  | -0.18 [-0.28, -0.08] |
| 30 |  |  | -0.23 [-0.36, -0.10] |

Notes: All mean differences presented in the table are significant at the α = 0.05 level. No other hypothetical time reallocation between any other behavioural pair resulted in significant mean differences. min = minutes, LPA = Light Physical Activity, SB = Sedentary Behaviour, MVPA = Moderate-to-Vigorous Physical Activity, CI = Confidence Interval.

Supplementary Table 4A. Hypothetical time reallocations and their associated positive mean differences in executive function z-scores.

| **Time (min)** | **Away from** | **Reallocated to** | **Mean differences in z-score, 95%CI** |
| --- | --- | --- | --- |
| 5 | LPA | MVPA | 0.04 [0.02, 0.06] |
| 10 |  |  | 0.07 [0.03, 0.11] |
| 15 |  |  | 0.11 [0.05, 0.17] |
| 20 |  |  | 0.14 [0.07, 0.22] |
| 25 |  |  | 0.18 [0.08, 0.27] |
| 30 |  |  | 0.21 [0.10, 0.33] |
| 5 | LPA | SB | 0.02 [0.01, 0.03] |
| 10 |  |  | 0.04 [0.02, 0.06] |
| 15 |  |  | 0.06 [0.03, 0.09] |
| 20 |  |  | 0.08 [0.04, 0.13] |
| 25 |  |  | 0.11 [0.05, 0.16] |
| 30 |  |  | 0.13 [0.06, 0.20] |
| 5 | LPA | Sleep | 0.01 [0.001, 0.02] |
| 10 |  |  | 0.03 [0.002, 0.05] |
| 15 |  |  | 0.04 [0.003, 0.08] |
| 20 |  |  | 0.05 [0.01, 0.10] |
| 25 |  |  | 0.07 [0.01, 0.13] |
| 30 |  |  | 0.08 [0.01, 0.16] |
| 5 | SB | MVPA | 0.02 [0.005, 0.03] |
| 10 |  |  | 0.03 [0.01, 0.05] |
| 15 |  |  | 0.05 [0.01, 0.08] |
| 20 |  |  | 0.06 [0.02, 0.10] |
| 25 |  |  | 0.07 [0.02, 0.12] |
| 30 |  |  | 0.08 [0.02, 0.14] |
| 5 | Sleep | MVPA | 0.02 [0.01, 0.04] |
| 10 |  |  | 0.05 [0.02, 0.07] |
| 15 |  |  | 0.07 [0.03, 0.11] |
| 20 |  |  | 0.09 [0.04, 0.14] |
| 25 |  |  | 0.11 [0.05, 0.17] |
| 30 |  |  | 0.13 [0.06, 0.20] |
| 5 | Sleep | SB | 0.01 [0.001, 0.01] |
| 10 |  |  | 0.02 [0.002, 0.03] |
| 15 |  |  | 0.02 [0.003, 0.04] |
| 20 |  |  | 0.03 [0.004, 0.06] |
| 25 |  |  | 0.04 [0.005, 0.07] |
| 30 |  |  | 0.05 [0.01, 0.09] |

Notes: All mean differences presented in the table are significant at the α = 0.05 level. No other hypothetical time reallocation between any other behavioural pair resulted in significant mean differences. min = minutes, LPA = Light Physical Activity, SB = Sedentary Behaviour, MVPA = Moderate-to-Vigorous Physical Activity, CI = Confidence Interval.

Supplementary Table 4B. Hypothetical time reallocations and their associated negative mean differences in executive function z-scores.

| **Time (min)** | **Away from** | **Reallocated to** | **Mean differences** **in z-score, 95%CI** |
| --- | --- | --- | --- |
| 5 | MVPA | LPA | -0.04 [-0.06, -0.02] |
| 10 |  |  | -0.08 [-0.12, -0.04] |
| 15 |  |  | -0.12 [-0.18, -0.05] |
| 20 |  |  | -0.16 [-0.25, -0.07] |
| 25 |  |  | -0.21 [-0.32, -0.09] |
| 30 |  |  | -0.26 [-0.40, -0.12] |
| 5 | MVPA | SB | -0.02 [-0.03, -0.01] |
| 10 |  |  | -0.04 [-0.06, -0.01] |
| 15 |  |  | -0.06 [-0.10, -0.02] |
| 20 |  |  | -0.09 [-0.14, -0.03] |
| 25 |  |  | -0.12 [-0.19, -0.04] |
| 30 |  |  | -0.15 [-0.25, -0.05] |
| 5 | MVPA | Sleep | -0.03 [-0.04, -0.01] |
| 10 |  |  | -0.05 [-0.08, -0.02] |
| 15 |  |  | -0.08 [-0.13, -0.04] |
| 20 |  |  | -0.12 [-0.18, -0.05] |
| 25 |  |  | -0.15 [-0.24, -0.07] |
| 30 |  |  | -0.19 [-0.31, -0.08] |
| 5 | Sleep | LPA | -0.01 [-0.02, -0.0004] |
| 10 |  |  | -0.02 [-0.05, -0.0005] |
| 15 |  |  | -0.03 [-0.07, -0.0002] |
| 5 | SB | LPA | -0.02 [-0.03, -0.01] |
| 10 |  |  | -0.04 [-0.06, -0.02] |
| 15 |  |  | -0.06 [-0.09, -0.03] |
| 20 |  |  | -0.08 [-0.12, -0.04] |
| 25 |  |  | -0.09 [-0.14, -0.05] |
| 30 |  |  | -0.11 [-0.17, -0.06] |
| 5 | SB | Sleep | -0.01 [-0.01, -0.001] |
| 10 |  |  | -0.02 [-0.03, -0.002] |
| 15 |  |  | -0.02 [-0.04, -0.003] |
| 20 |  |  | -0.03 [-0.06, -0.004] |
| 25 |  |  | -0.04 [-0.07, -0.01] |
| 30 |  |  | -0.05 [-0.09, -0.01] |

Notes: All mean differences presented in the table are significant at the α = 0.05 level. No other hypothetical time reallocation between any other behavioural pair resulted in significant mean differences. min = minutes, LPA = Light Physical Activity, SB = Sedentary Behaviour, MVPA = Moderate-to-Vigorous Physical Activity, CI = Confidence Interval.

Supplementary Table 5. Hypothetical time reallocations and their associated mean differences in short-term memory z-scores.

| **Time (min)** | **Away from** | **Reallocated to** | **Mean differences in z-score, 95%CI** |
| --- | --- | --- | --- |
| 5 | LPA, SB, Sleep (proportionally) | MVPA | 0.03 [0.01, 0.04] |
| 10 |  | 0.05 [0.02, 0.08] |
| 15 |  |  | 0.07 [0.03, 0.11] |
| 20 |  |  | 0.09 [0.04, 0.15] |
| 25 |  |  | 0.11 [0.05, 0.18] |
| 30 |  |  | 0.13 [0.06, 0.21] |
| 5 | MVPA | LPA, SB, Sleep  (proportionally) | -0.03 [-0.04, -0.01] |
| 10 |  | -0.06 [-0.09, -0.02] |
| 15 |  |  | -0.09 [-0.14, -0.04] |
| 20 |  |  | -0.13 [-0.20, -0.05] |
| 25 |  |  | -0.17 [-0.27, -0.07] |
| 30 |  |  | -0.21 [-0.34, -0.09] |

Notes: All mean changes presented in the table are significant at the α = 0.05 level. No other proportional time reallocation resulted in significant mean changes. min = minutes, LPA = Light Physical Activity, SB = Sedentary Behaviour, MVPA = Moderate-to-Vigorous Physical Activity, CI = Confidence Interval.

Supplementary Table 6. Hypothetical time reallocations and their associated mean differences in executive function z-scores.

| **Time (min)** | **Away from** | **Reallocated to** | **Mean differences in z-score, 95%CI** |
| --- | --- | --- | --- |
| 5 | LPA, SB, Sleep (proportionally) | MVPA | 0.02 [0.01, 0.03] |
| 10 |  | 0.04 [0.02, 0.07] |
| 15 |  |  | 0.06 [0.02, 0.10] |
| 20 |  |  | 0.08 [0.03, 0.12] |
| 25 |  |  | 0.09 [0.04, 0.15] |
| 30 |  |  | 0.11 [0.04, 0.18] |
| 5 | LPA, SB, Sleep (proportionally) | SB | 0.01 [0.003, 0.01] |
| 10 |  | 0.02 [0.01, 0.03] |
| 15 |  |  | 0.02 [0.01, 0.04] |
| 20 |  |  | 0.03 [0.01, 0.05] |
| 25 |  |  | 0.04 [0.01, 0.07] |
| 30 |  |  | 0.05 [0.02, 0.08] |
| 5 | LPA | LPA, SB, Sleep  (proportionally) | 0.02 [0.01, 0.03] |
| 10 |  | 0.04 [0.02, 0.06] |
| 15 |  |  | 0.06 [0.02, 0.09] |
| 20 |  |  | 0.08 [0.03, 0.12] |
| 25 |  |  | 0.10 [0.04, 0.16] |
| 30 |  |  | 0.12 [0.05, 0.19] |
| 5 | MVPA | LPA, SB, Sleep  (proportionally) | -0.02 [-0.04, -0.01] |
| 10 |  | -0.05 [-0.08, -0.02] |
| 15 |  |  | -0.08 [-0.12, -0.03] |
| 20 |  |  | -0.11 [-0.17, -0.04] |
| 25 |  |  | -0.14 [-0.22, -0.06] |
| 30 |  |  | -0.18 [-0.28, -0.07] |
| 5 | SB | LPA, SB, Sleep  (proportionally) | -0.01 [-0.01, -0.003] |
| 10 |  | -0.02 [-0.03, -0.01] |
| 15 |  |  | -0.02 [-0.04, -0.01] |
| 20 |  |  | -0.03 [-0.05, -0.01] |
| 25 |  |  | -0.04 [-0.07, -0.01] |
| 30 |  |  | -0.05 [-0.08, -0.02] |

Notes: All mean differences presented in the table are significant at the α = 0.05 level. No other proportional time reallocation resulted in significant mean differences. min = minutes, LPA = Light Physical Activity, SB = Sedentary Behaviour, MVPA = Moderate-to-Vigorous Physical Activity, CI = Confidence Interval.

Supplementary figure 1. Hypothetical time reallocations and their predicted mean differences in cognitive z-scores.

1. **Short-Term Memory**


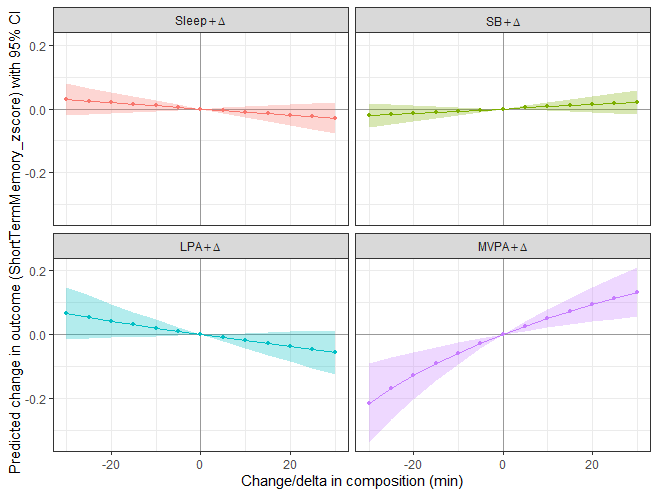


1. **Executive function**

**
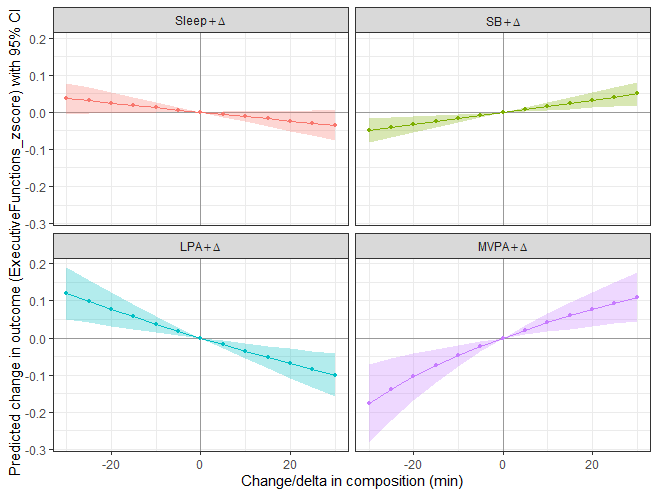
**

Panel A displays the predicted mean differences in short-term memory z-scores on the y-axis, with the x-axis representing time reallocations (−30 to +30 min/day). Panel B shows the predicted mean differences in executive function z-scores on the y-axis, with the x-axis representing the time reallocations. Time is reallocated proportionally in 5-minute increments to one behaviour. Behaviour+Δ indicates time reallocated to that behaviour by proportionally reducing time in the three others. SB: sedentary behaviour, LPA: light physical activity, MVPA: moderate-to-vigorous physical activity. Both models were adjusted for age, sex, education level and living situation (Model 2).
